# Supplementary material for: Multiphysics property prediction from hyperspectral drill core data
Source: Copernicus journal article supplement (doi:10.5194/se-16-351-2025), 2025-05-15
Supplement: Supplementary file 1 [file se-16-351-2025-supplement.zip]

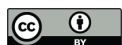

## *Supplement of*

# **Multiphysics property prediction from hyperspectral drill core data**

**Akshay V. Kamath et al.**

*Correspondence to:* Akshay V. Kamath (a.kamath@hzdr.de)

- se-16-351-2025-supplement-title-page.pdf
- Figure S1.png

The copyright of individual parts of the supplement might differ from the article licence.
